# Supplementary material for: Evaluation der Gewaltopferambulanz des Instituts für Rechtsmedizin Greifswald durch die Betroffenen
Source: Springer Nature journal article supplement (doi:10.1007/s00194-023-00683-4), 2024-01-30

Bitte so markieren:     Bitte verwenden Sie einen Kugelschreiber oder nicht zu starken Filzstift. Dieser Fragebogen wird maschinell erfasst.  
Korrektur:     Bitte beachten Sie im Interesse einer optimalen Datenerfassung die links gegebenen Hinweise beim Ausfüllen.

Liebe Teilnehmer\*innen,

Sie sind Opfer von Gewalt geworden und haben sich in unserer Gewaltopferambulanz vorgestellt.

Unser Wunsch ist es, die Untersuchungsbedingungen von Ihnen bewerten zu lassen, um in Zukunft noch besser auf die Bedürfnisse und Wünsche der Opfer von Gewalt eingehen zu können. Wir sind stets motiviert, unsere Arbeit zu verbessern. Sie können uns dabei helfen.

Dieser Fragebogen besteht aus 17 Fragen, pro Frage ist eine Antwortmöglichkeit auszuwählen. Sie benötigen zum Ausfüllen des Bogens ca. 5 Minuten.

**Ihre Teilnahme an dieser Befragung ist freiwillig und erfolgt anonym, so dass ein Rückschluss auf Ihre Person ausgeschlossen ist.**

Mit Ihrer Teilnahme erklären Sie sich mit den oben genannten Hinweisen einverstanden.

Ihr Team der Rechtsmedizin Greifswald

## 1. Persönliche Angaben

- 1.1 Wie alt sind Sie?  unter 18 Jahre  18 bis 25 Jahre  26 bis 35 Jahre  
 36 bis 45 Jahre  46 bis 55 Jahre  56 bis 65 Jahre  
 über 65 Jahre

- 1.2 Ich bin:  
 männlich  weiblich  divers

## 2. Allgemeine Fragen zur Terminvereinbarung

- 2.1 Durch wen wurde(n) die Verletzungen(en) verursacht, wegen derer Sie sich vorstellten?  
 Lebenspartner\*in/ feste(r) Freund\*in/ Ehepartner(in)  Andere Verwandte  Freunde/Bekannte  
 Jemand Fremdes/ Unbekannter Täter\*in  Sonstiges

- 2.2 Wodurch sind Sie auf die Gewaltopferambulanz aufmerksam geworden?  
 Polizei  Rettungsdienst  Notaufnahme  
 Behandelnder Arzt\*in  Interventionsstelle  Jemand anderes

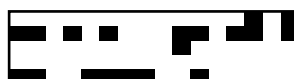

## 2. Allgemeine Fragen zur Terminvereinbarung [Fortsetzung]

2.3 Wer hat den Termin für Sie vereinbart?

- Ich selber
  Die Interventionsstelle
  Der behandelnde Arzt\*in  
 Jemand anderes

2.4 Wenn Sie diesen Termin nicht selbst vereinbart haben: Hätten Sie den Termin auch selbst vereinbart/ vereinbaren können?

- Ja
  Nein

2.5 Wenn Sie diesen Termin selbst vereinbart haben: Wie beurteilen Sie die Terminvereinbarung?

- Einfach
  In Ordnung
  Ausreichend  
 Kompliziert

## 3. Fragen zum Untersuchungsort

3.1 Wo fand Ihre Untersuchung statt?

- Institut für Rechtsmedizin in Greifswald
  Klinik
  Interventionsstelle  
 Anderer Untersuchungsort

3.2 Falls Sie **nicht** in Greifswald untersucht wurden, hätte für Sie die Möglichkeit bestanden, für die Untersuchung nach Greifswald zu kommen?

- Ja
  Nein

## 4. Ihre Einschätzung der Gewaltopferambulanz

4.1 Wie würden Sie die rechtsmedizinische Untersuchung zusammenfassend beurteilen?

- | Ausgezeichnet            | Gut                      | Ausreichend              | Dürftig                  | Keine Angabe             |
|--------------------------|--------------------------|--------------------------|--------------------------|--------------------------|
| <input type="checkbox"/> |

4.2 Wie beurteilen Sie die Empathie (das Einfühlungsvermögen) des untersuchenden Arztes?

- | Ausgezeichnet            | Gut                      | Ausreichend              | Dürftig                  | Keine Angabe             |
|--------------------------|--------------------------|--------------------------|--------------------------|--------------------------|
| <input type="checkbox"/> |

4.3 Wie beurteilen Sie die durchgeführte Fotodokumentation im Rahmen der Untersuchung?

- | angenehm                 | akzeptabel               | unangenehm               | Sehr unangenehm          | Nicht durchgeführt       |
|--------------------------|--------------------------|--------------------------|--------------------------|--------------------------|
| <input type="checkbox"/> |

4.4 Hatten Sie die Möglichkeit im Rahmen der Untersuchung Fragen zu stellen?

- Ja
  Nein
  Trifft nicht zu

4.5 Wenn Sie im Rahmen der Untersuchung Fragen stellen konnten, wie wurden diese beantwortet?

- | Ausgezeichnet            | Gut                      | Ausreichend              | Dürftig                  | Keine Angabe             |
|--------------------------|--------------------------|--------------------------|--------------------------|--------------------------|
| <input type="checkbox"/> |

4.6 Würden Sie sich wieder in unserer Gewaltopferambulanz vorstellen, wenn Sie Hilfe bräuchten?

- Eindeutig nicht
  Ich glaube nicht
  Ich glaube ja  
 Eindeutig ja

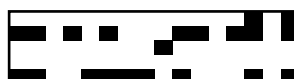

**4. Ihre Einschätzung der Gewaltopferambulanz [Fortsetzung]**

|                                                                                                                                              | Ausgezeichnet            | Gut                      | Ausreichend              | Dürftig                  | Keine Angabe             |
|----------------------------------------------------------------------------------------------------------------------------------------------|--------------------------|--------------------------|--------------------------|--------------------------|--------------------------|
| 4.7 Wie wurden Sie durch den Arzt der Rechtsmedizin über weitere Hilfsmöglichkeiten, Angebote, Möglichkeiten zur Strafanzeige, o.ä. beraten? | <input type="checkbox"/> |
| 4.8 Wie hat Ihnen die Vorstellung in der Gewaltopferambulanz in Ihrer aktuellen Lebenssituation geholfen?                                    | <input type="checkbox"/> |

Herzlichen Dank für Ihre Zeit!

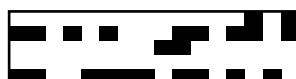

Supplement: MOESM1 [file 26677182]
